# Supplementary material for: Integrated information structure collapses with anesthetic loss of conscious arousal in Drosophila melanogaster
Source: PubMed Central journal article supplement (PMC7946294; doi:10.1371/journal.pcbi.1008722), 2021-02-26
Supplement: pcbi.1008722.s006.pdf [file pcbi.1008722.s006.pdf]

## S6 Text. 1-channel mechanisms do not drive classification performance of the IIS

As shown in Fig 4C, 1-channel mechanisms were associated with a higher magnitude of integrated information compared to other higher-order mechanisms. To quantify the degree of contribution of these 1-channel integrated information for the IIS classification, we repeated the classification analysis without integrated information associated with 1-channel mechanisms (Fig S7), which demonstrated no substantial contribution of 1-channel integrated information.

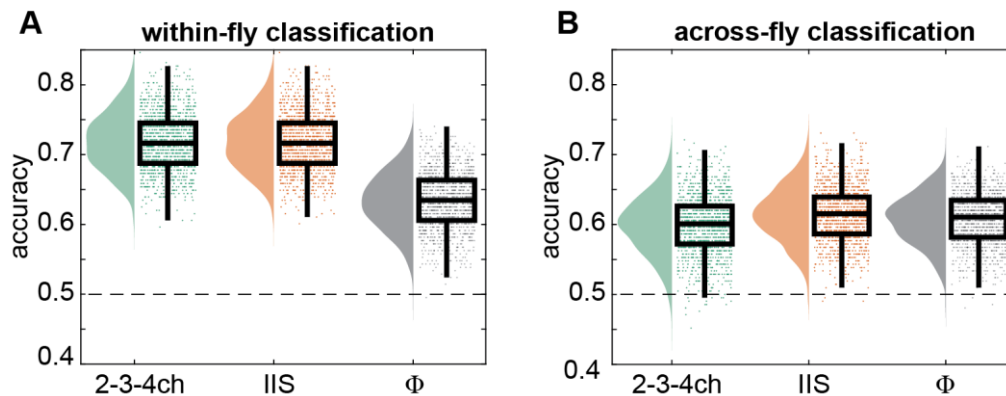

**Fig S7.** Classification accuracy between wakeful vs. anesthetized conditions using the IIS without 1-channel integrated information (green). **(A)** Within-fly and **(B)** across-fly classification. We replot the same results for the IIS and system-level integrated information for comparison (the same data as in Fig 5A and 5B).

For within-fly classification, the restricted IIS consisting of only 2-, 3-, and 4-channel mechanisms did not achieve significantly different performance to the full IIS ( $\chi^2(1) = 0.5691$ ,  $p = 0.451$  using LME model (5), see Methods, where feature had two levels, restricted IIS, i.e. lacking 1-channel mechanisms, or full IIS including all mechanisms; pairwise comparison of restricted IIS to full IIS,  $\beta = 9.862 \times 10^{-5}$ ,  $t(7) = -0.658$ ,  $p = .523$ ; Fig S7A). For across-fly classification, the restricted IIS achieved worse performance than the full IIS ( $\chi^2(1) = 306.5$ ,  $p < .001$ ;  $\beta = -0.0155$ ,  $t(7) = -4.401$ ,  $p = .003$ ). Taken together with the AIC results (S5 Text), we conclude that while 1-channel mechanisms contributed to the IIS, they were not driving its classification performance.
